# Supplementary material
Source: publisher site journal article supplement (https://www.dovepress.com/get_supplementary_file.php?f=318812.docx)
Supplement: Supplementary file 1 [file get_supplementary_file.php]

**SUPPLEMENTARY DATA**

**
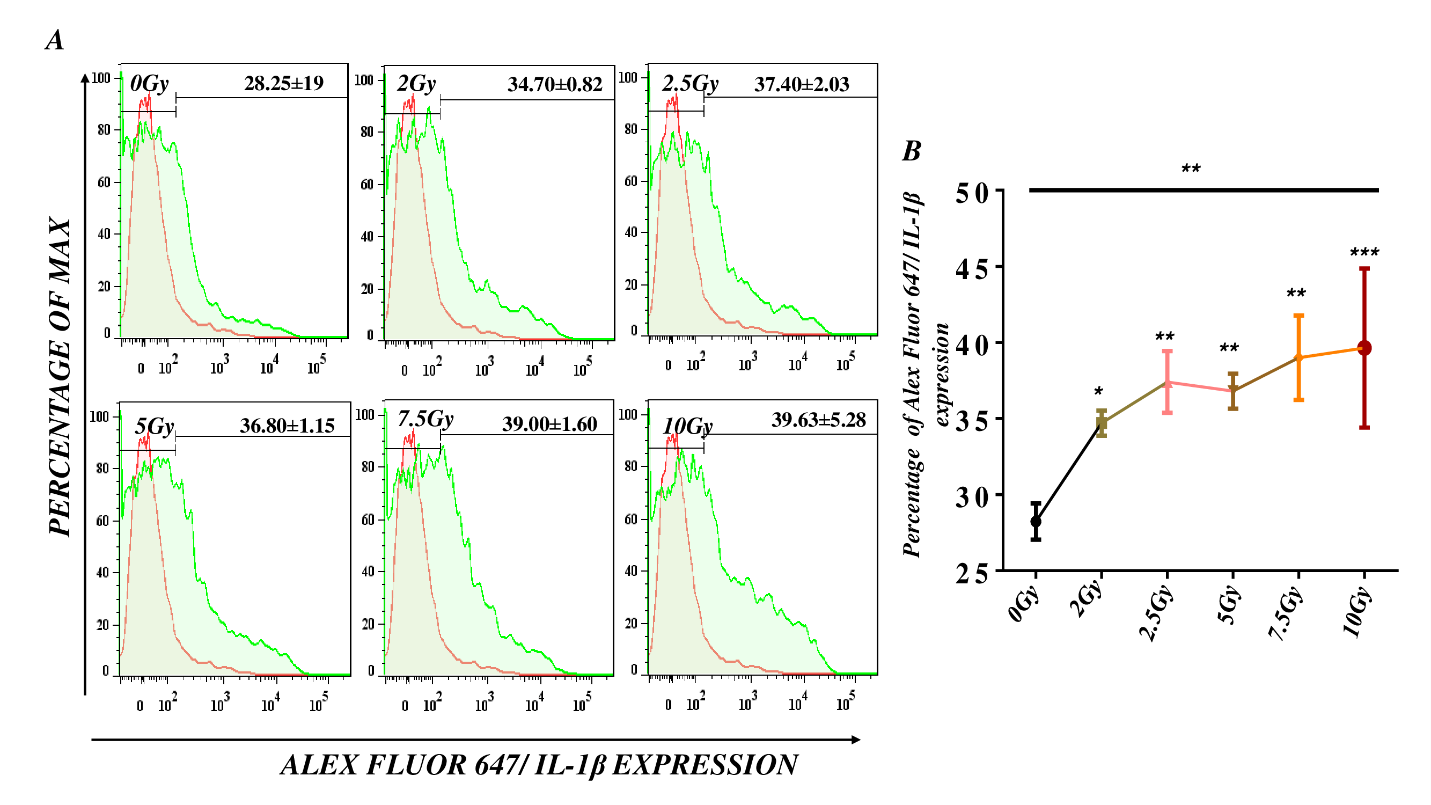
**

Figure S1: Ionizing radiation promotes the production of IL-1β in microvascular endothelial cells A)Assessment of the IL-1β expression using Alex fluor 647 present in the histogram. The red indicates unstained cells and green Alex fluor 647 (IL-1β expression). (B) Percentage of IL-1β expression (Alex fluor 647). The results are representative of 6 independent experiments of three repeats (N= 3) (Mean ± SD) *P<0.05, **p < 0.01, and ***p < 0.0001
